# Supplementary material for: Creatine transporter (SLC6A8) knockout mice exhibit reduced muscle performance, disrupted mitochondrial Ca2+ homeostasis, and severe muscle atrophy
Source: Springer Nature journal article supplement (doi:10.1038/s41419-025-07381-x), 2025-02-14
Supplement: MOESM2 [file 41419_2025_7381_MOESM2_ESM.pdf › 41419_2025_7381_MOESM2_ESM.pdf]

# Figure 2

## F

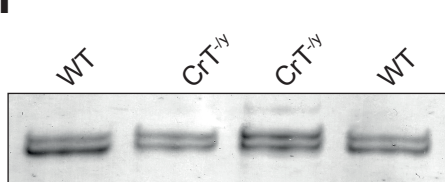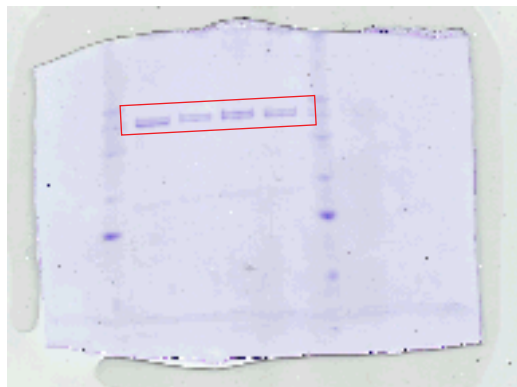

# Figure 3

## D

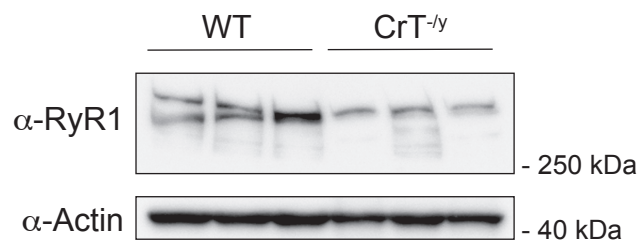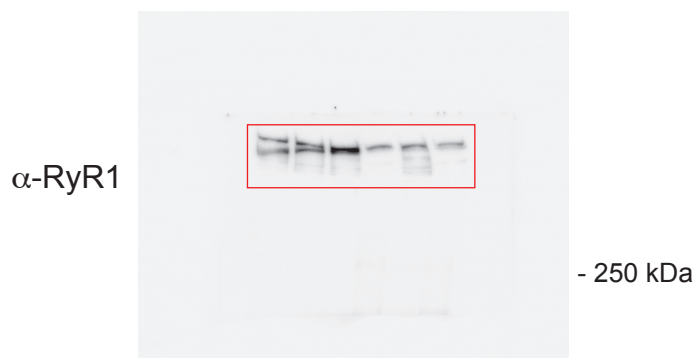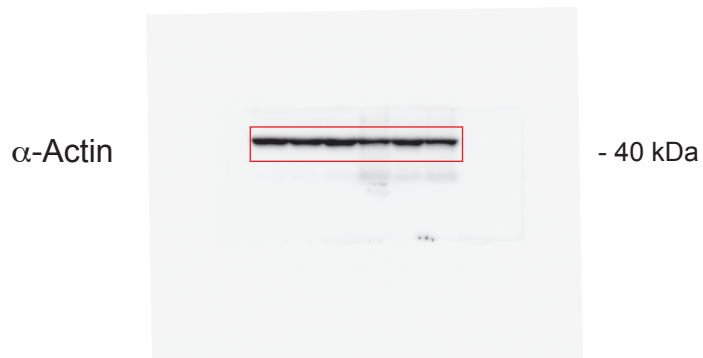

## F

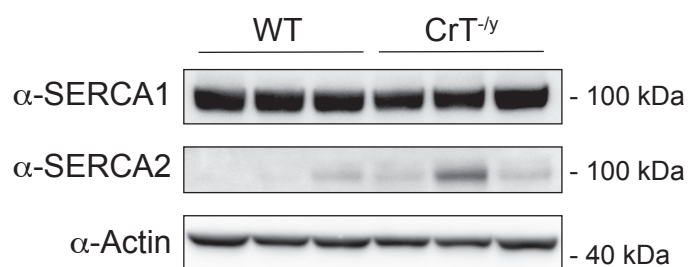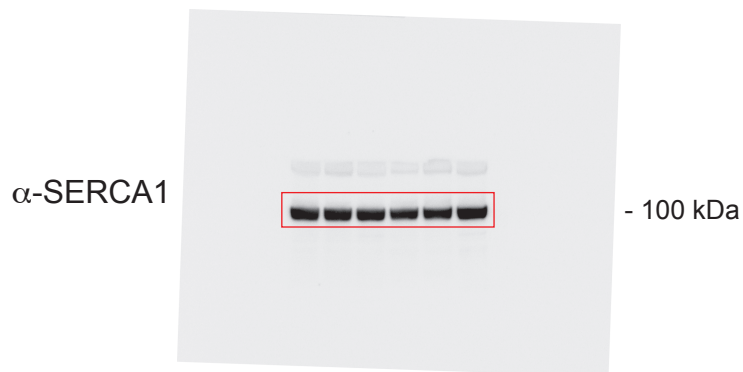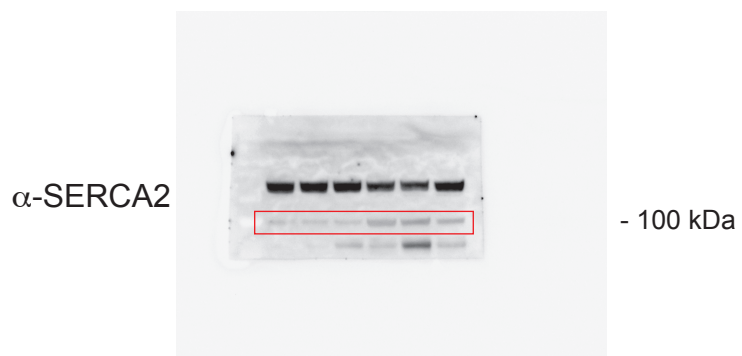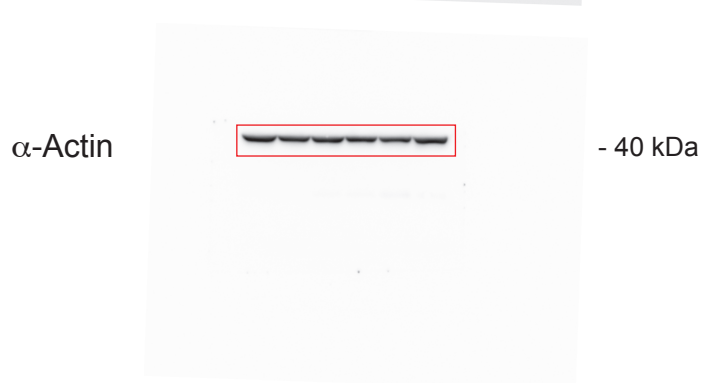

Figure 5

F

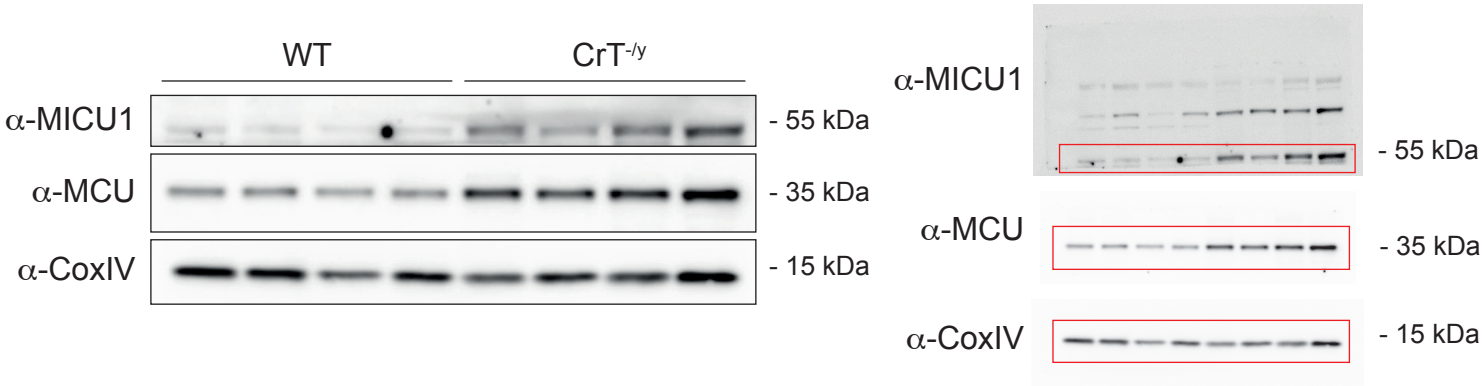

H

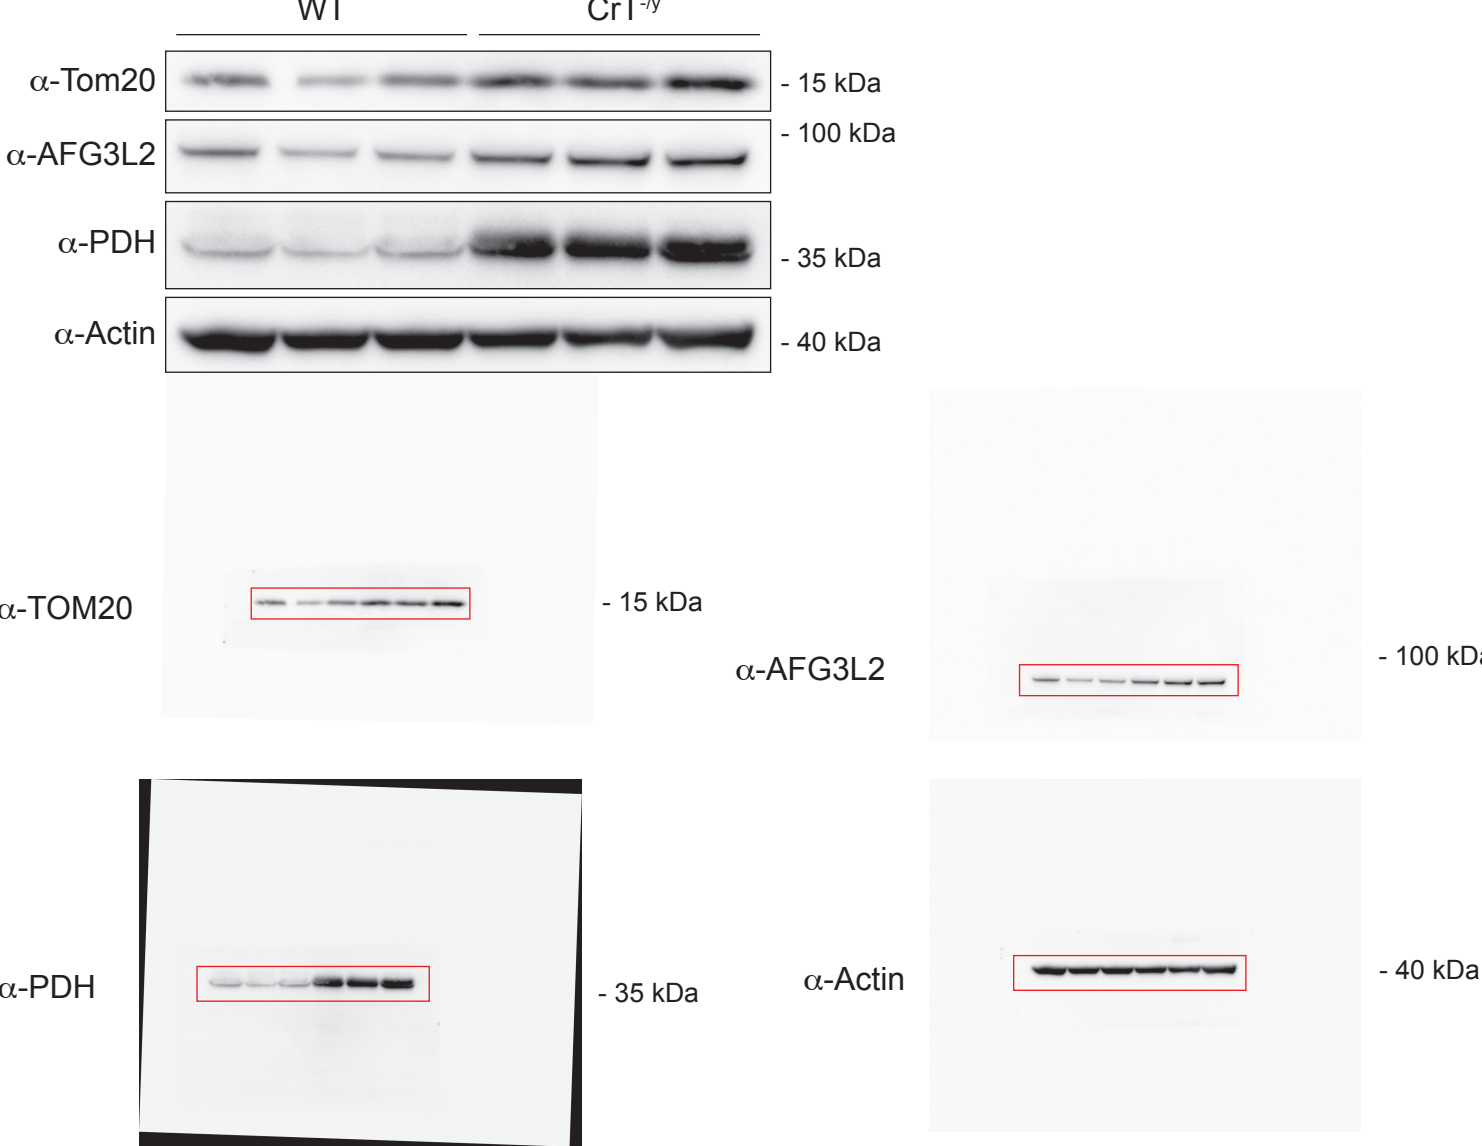

Figure 5

E

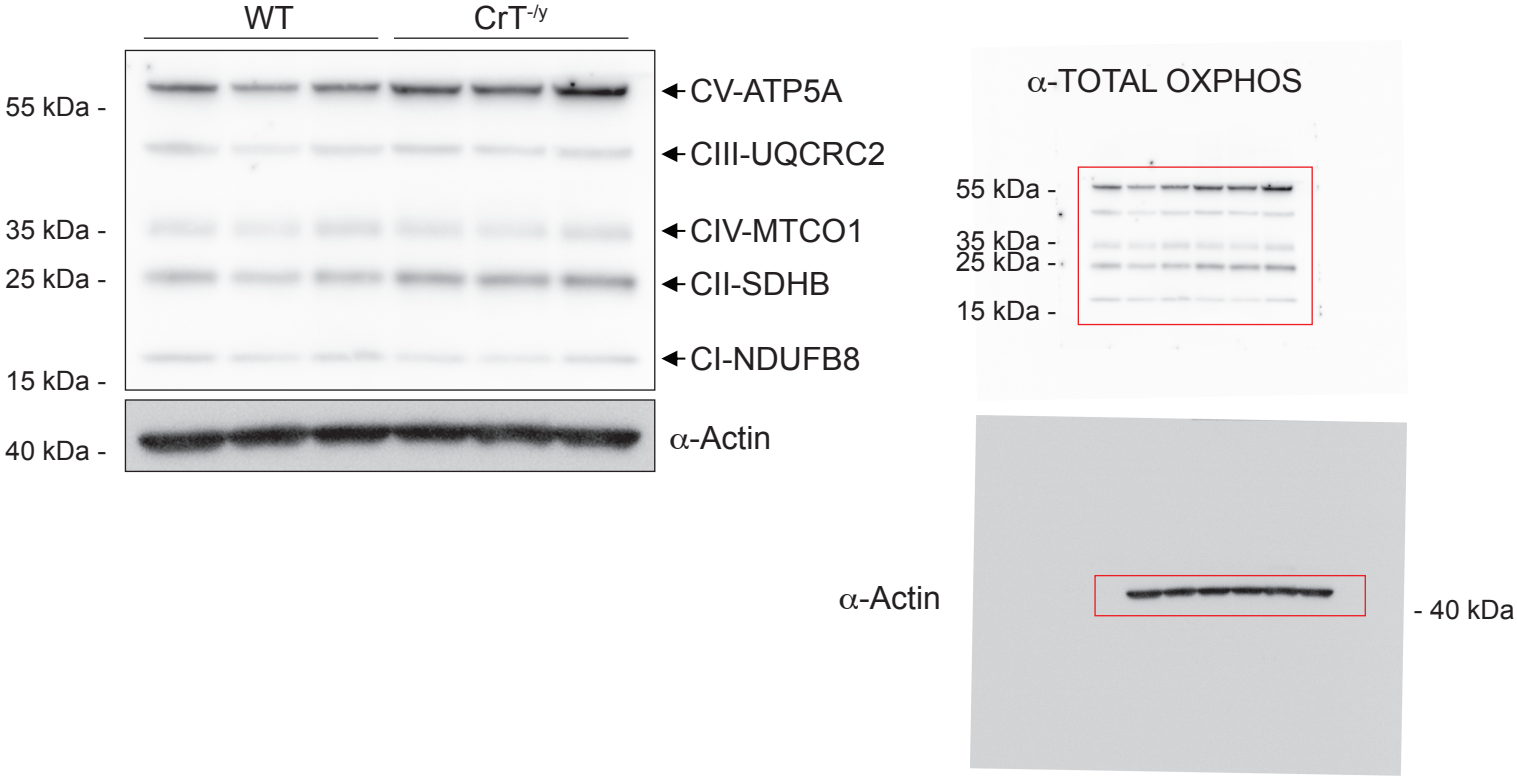

Figure 6

A

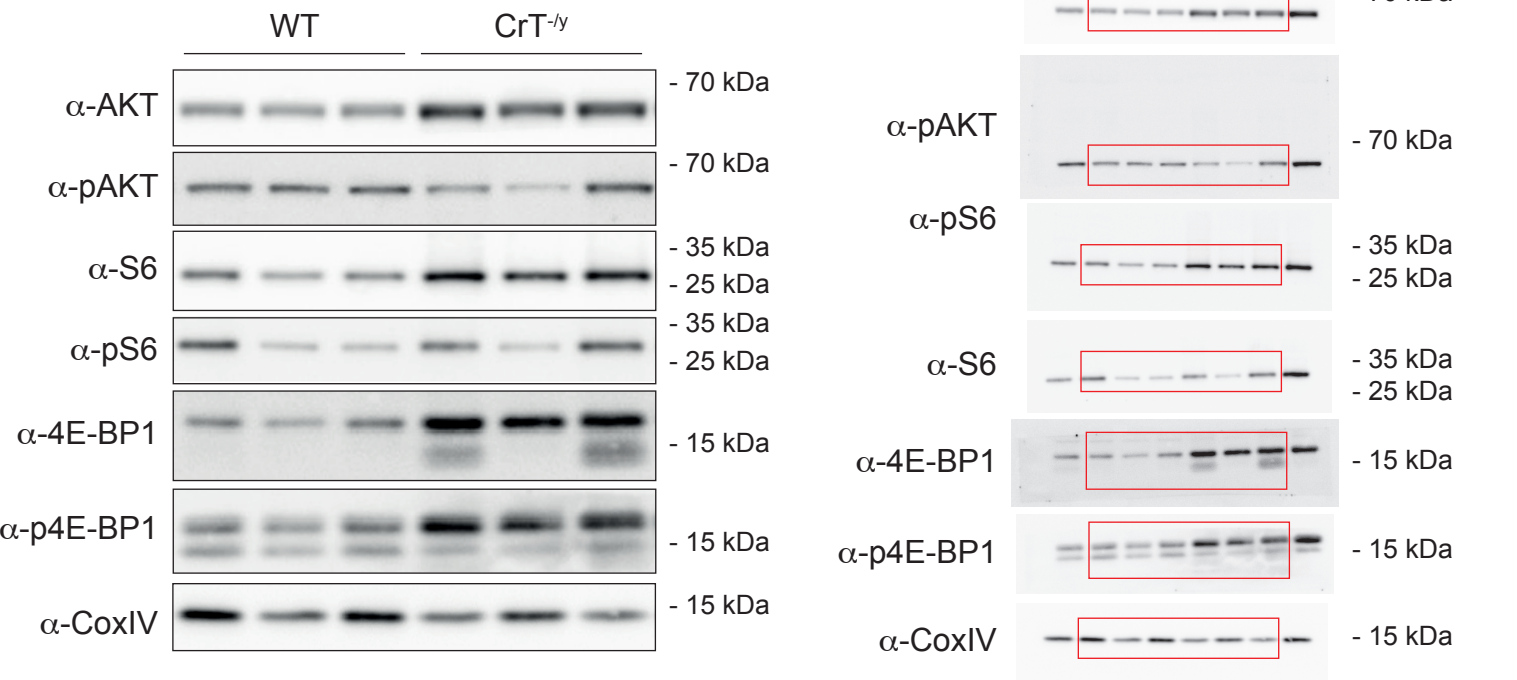

qPCR data

Figure 5G

|                     | MCU              | MICU1            |
|---------------------|------------------|------------------|
| Sample              | Expression ratio | Expression ratio |
| WT 1                | 0.835697724      | 0.978771604      |
| WT 2                | 1.248329053      | 1.037129149      |
| WT 3                | 0.915973223      | 0.984099247      |
| CrT <sup>-y</sup> 1 | 2.071035926      | 3.252158027      |
| CrT <sup>-y</sup> 2 | 1.314156335      | 2.096260642      |
| CrT <sup>-y</sup> 3 | 1.663386829      | 1.659007486      |

**Figure 5I**

|                     | <b>Pgc-1<math>\alpha</math></b> |
|---------------------|---------------------------------|
| Sample              | Expression ratio                |
| WT 1                | 0.981710603                     |
| WT 2                | 0.863260838                     |
| WT 3                | 1.279378492                     |
| WT 4                | 0.815851207                     |
| WT 5                | 1.129587977                     |
| WT 6                | 1.000793352                     |
| CrT <sup>-y</sup> 1 | 1.44774111                      |
| CrT <sup>-y</sup> 2 | 2.120125856                     |
| CrT <sup>-y</sup> 3 | 1.839987608                     |
| CrT <sup>-y</sup> 4 | 1.486664988                     |
| CrT <sup>-y</sup> 5 | 2.105324053                     |

**Figure 6E**

|                     | <b>Atrogin-1</b> | <b>MuRF-1</b>    | <b>MUSA1</b>     |
|---------------------|------------------|------------------|------------------|
| Sample              | Expression ratio | Expression ratio | Expression ratio |
| WT 1                | 1.010450136      | 0.704101395      | 1.086560261      |
| WT 2                | 1.306141124      | 0.508806614      | 0.925527601      |
| WT 3                | 1.183194273      | 1.050788549      | 1.012877918      |
| WT 4                | 0.963576924      | 1.49522963       | 0.871966065      |
| WT 5                | 0.901401912      | 1.483196354      | 1.247955679      |
| WT 6                | 0.737282772      | 1.197816172      | 0.902196129      |
| CrT <sup>-y</sup> 1 | 2.567115313      | 0.895972561      | 2.12008118       |
| CrT <sup>-y</sup> 2 | 4.807150752      | 1.113741371      | 2.94222575       |
| CrT <sup>-y</sup> 3 | 2.547160189      | 1.346723092      | 3.79361092       |
| CrT <sup>-y</sup> 4 | 1.905501117      | 0.987358768      | 2.470729545      |
| CrT <sup>-y</sup> 5 | 3.952746645      | 1.500608852      | 4.098894542      |
